# Supplementary material
Source: PubMed Central journal article supplement (PMC9589543)
Supplement: 253_2022_12230_MOESM1_ESM.pdf [file 253_2022_12230_MOESM1_ESM.pdf]

**Journal name:** Applied Microbiology and Biotechnology

DnaJ, a promising vaccine candidate against *Ureaplasma urealyticum* infection

**Authors:** Fangyi Guo <sup>1,2,3</sup>, Yanhong Tang <sup>4</sup>, Wenjun Zhang <sup>1,3</sup>, Hongxia Yuan <sup>3</sup>, Jing Xiang <sup>3</sup>, Wenyong Teng <sup>3</sup>, Aihua Lei <sup>2</sup>, Ranhui Li <sup>2\*</sup> and Guozhi Dai <sup>1,3\*</sup>

**Institution:**<sup>1</sup> The Chenzhou Affiliated Hospital, Hengyang Medical School, University of South China, Chenzhou, China

<sup>2</sup> Pathogenic biology Institute, Hengyang Medical School, University of South China, Hengyang, China

<sup>3</sup> The First People's Hospital of Chenzhou, Chenzhou, China

<sup>4</sup> State Key Laboratory of Respiratory Diseases, Guangzhou Medical University, Guangzhou, China

\*Corresponding author: Guozhi Dai

The Chenzhou Affiliated Hospital, Hengyang Medical School, University of South China

Chenzhou, 423000, China

Tel: 86 13975522423

Fax: 86 0735-2345651

E-mail: [daigz008@126.com](mailto:daigz008@126.com)

Ranhui Li

Pathogenic biology Institute, Hengyang Medical School, University of South China

Hengyang, 421000, China

Tel: 86 18073467183

Fax: 86 0734 8292761

E-mail: [Ranhui81@163.com](mailto:Ranhui81@163.com)

**Figure S1**

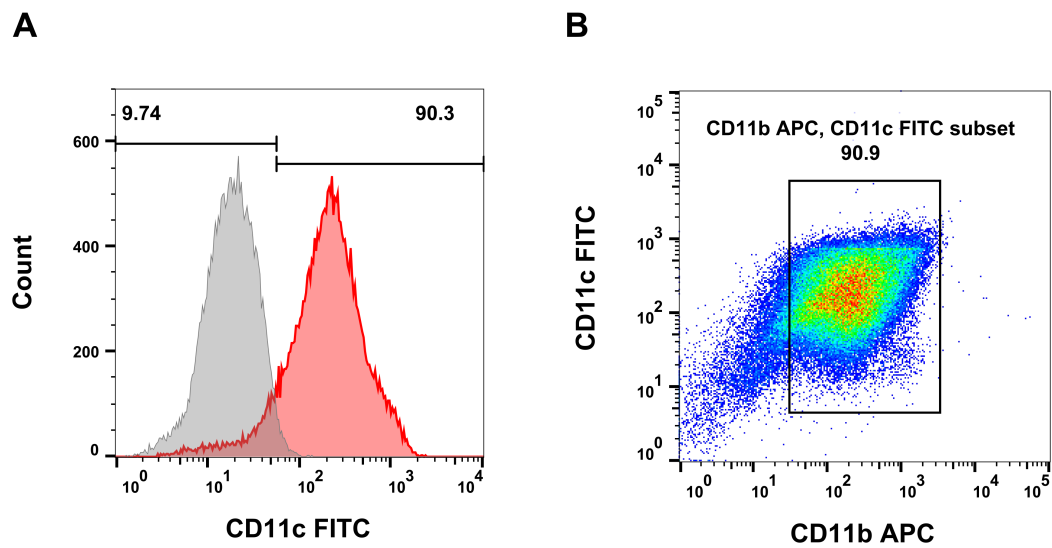

**Figure S1** The specific marker of BMDCs. Generation of BMDCs from the bone marrow precursors after 6 d culture with 10 ng/mL GM-CSF and 10 ng/mL IL-4. (A) CD11c<sup>+</sup> cells were detected by FACS. More than 90% of the suspension cells expressed CD11c. (B) Purity of BMDCs cultures as determined by FACS using expression of BMDC markers CD11c and CD11b.

**Table S1.** Evaluation of the conservative distribution of *Ureaplasma urealyticum* (Uu)-DnaJ protein sequences.

| Order | Serovars   | Identities(%) | Positives(%) | Gaps(%) | E |
|-------|------------|---------------|--------------|---------|---|
| 1     | Serovar 2  | 100%          | 100%         | 0       | 0 |
| 2     | Serovar 4  | 100%          | 100%         | 0       | 0 |
| 3     | Serovar 5  | 100%          | 100%         | 0       | 0 |
| 4     | Serovar 7  | 100%          | 100%         | 0       | 0 |
| 5     | Serovar 8  | 100%          | 100%         | 0       | 0 |
| 6     | Serovar 9  | 99%           | 99%          | 0       | 0 |
| 7     | Serovar12  | 100%          | 100%         | 0       | 0 |
| 8     | Serovar 13 | 100%          | 100%         | 0       | 0 |

**Table S2.** Uu-DnaJ CTL predicted epitopes

| S. No. | Peptide | Peptide | Length | Peptide   | HLA class I allele restriction                       |
|--------|---------|---------|--------|-----------|------------------------------------------------------|
| 1      | 262     | 270     | 9      | FAFDGLDIY | HLA-A*01:01; HLA-B*35:01                             |
| 2      | 357     | 365     | 9      | RTNQSVEYY | HLA-A*01:01                                          |
| 3      | 280     | 288     | 9      | AIVGGVIEV | HLA-A*02:01; HLA-A*02:06                             |
| 4      | 196     | 204     | 9      | GTGKVANSK | HLA-A*11:01                                          |
| 5      | 22      | 30      | 9      | KTAFRKLAK | HLA-A*03:01; HLA-A*11:01                             |
| 6      | 111     | 119     | 9      | SSSSQYETY | HLA-A*01:01; HLA-B*35:01                             |
| 7      | 17      | 25      | 9      | SPEEIKTAF | HLA-B*07:02; HLA-B*08:01<br>HLA-B*35:01              |
| 8      | 273     | 281     | 9      | TYVDPIKAI | HLA-A*24:02; HLA-A*23:01<br>HLA-A*24:02; HLA-A*02:06 |

**Table S3.** Uu-DnaJ HTL predicted epitopes

| S. No. | Peptide start | Peptide | Length | Peptide         |
|--------|---------------|---------|--------|-----------------|
| 1      | 346           | 360     | 15     | EEIAYLKNISARTNQ |
| 2      | 99            | 113     | 15     | FGSFFKNGASSRSSH |
| 3      | 257           | 271     | 15     | KPSKYFAFDGLDIYS |
| 4      | 305           | 319     | 15     | EGKKFRISGAGIVNK |
| 5      | 62            | 76      | 15     | AQYDQFGHDGPQGFA |
| 6      | 19            | 33      | 15     | EEIKTAFRKLAKHH  |
| 7      | 127           | 141     | 15     | LEFIEAIKGVSKNIS |

**Figure S2**

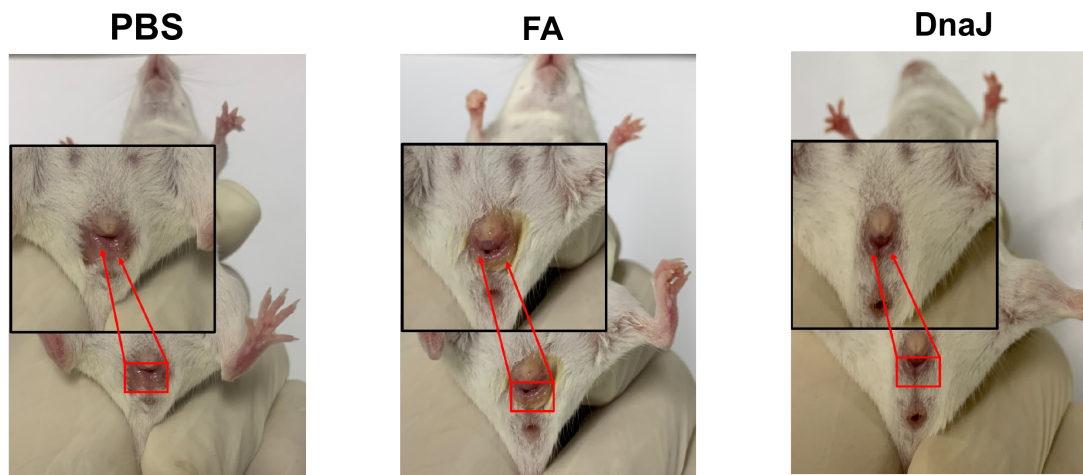

**Figure S2** Representative photographs of the vulva in mice 14 days after infection.

Figure S3

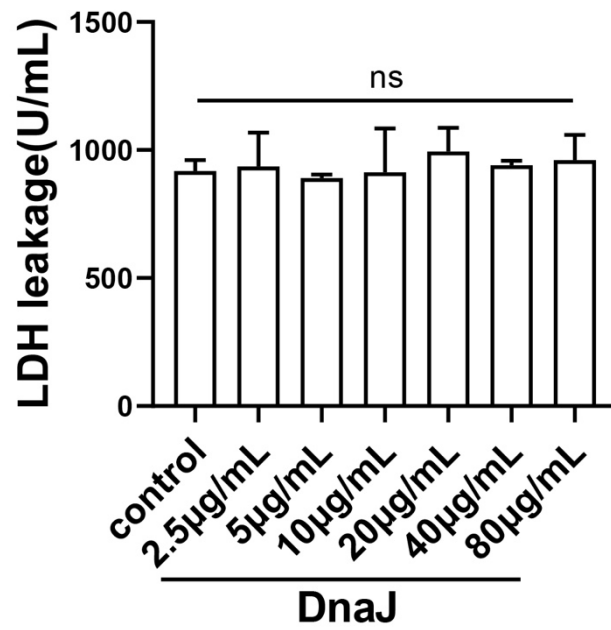

**Figure 3** The noncytotoxic dose of DnaJ on BMDCs was detected. BMDCs were treated with DnaJ at a concentration from 2.5 µg/mL to 80 µg/mL with for 48 h, and the LDH activity in the supernatant was measured with a kit, ns = not significant,  $P > 0.05$ .
